# Supplementary material for: Polarization of macrophages in the tumor microenvironment is influenced by EGFR signaling within colon cancer cells
Source: Oncotarget. 2016 Sep 23;7(46):75366–78. doi: 10.18632/oncotarget.12207 (PMC5342747; doi:10.18632/oncotarget.12207)
Supplement: Supplementary file 1 [file oncotarget-07-75366-s001.pdf]

## Polarization of macrophages in the tumor microenvironment is influenced by EGFR signaling within colon cancer cells

### SUPPLEMENTARY FIGURES

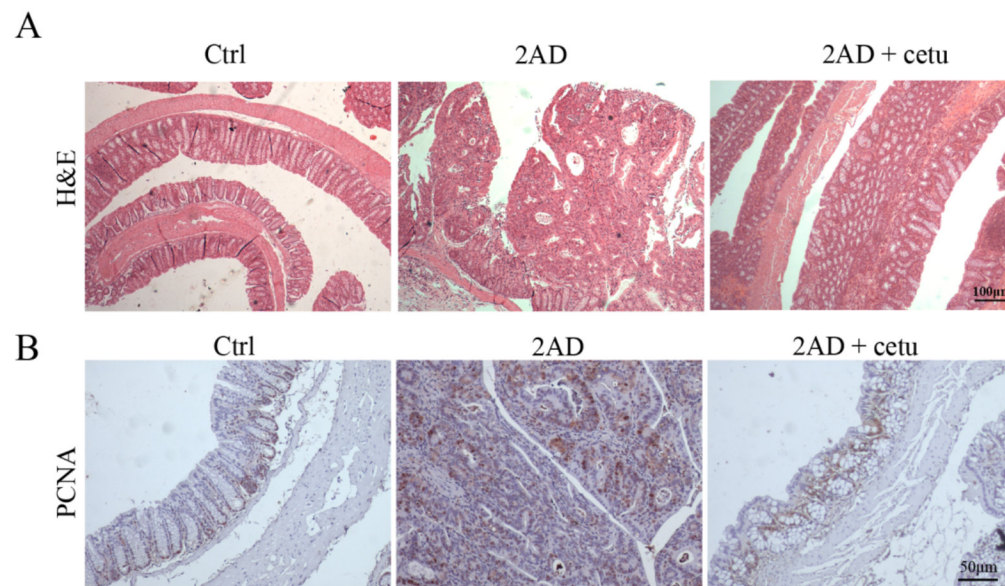

**Supplementary Figure S1: Establishment of AOM/DSS mouse model.** **A.** Histology of colon tissues in normal mice (Ctrl), AOM/DSS (2AD) and cetuximab treated 2AD (2AD + cetu) mice. Scale bars: 100  $\mu$ m. **B.** Representative photomicrographs of immunostaining for PCNA in normal mice (Ctrl), 2AD mice and 2AD + cetu mice. Scale bars: 50  $\mu$ m.

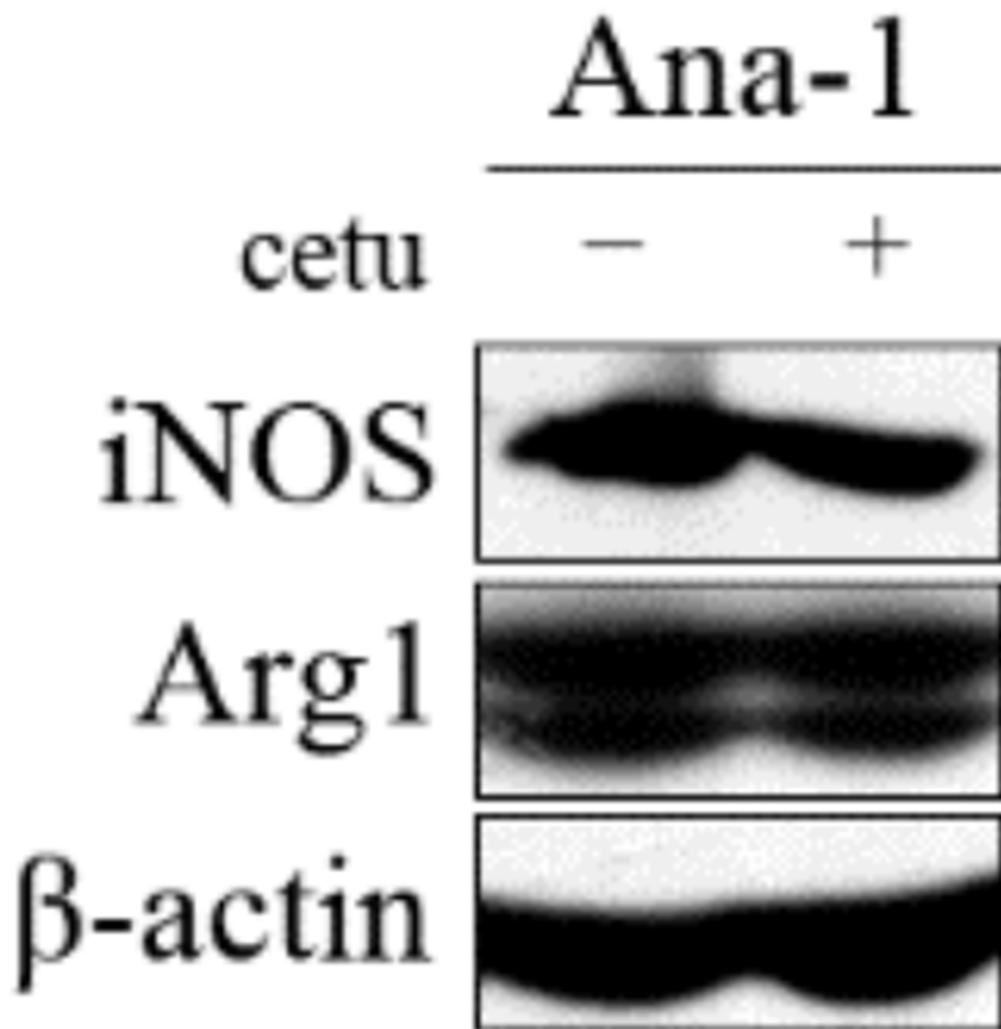

**Supplementary Figure S2: Cetuximab had no directly effect on the polarization of Ana-1 cells.** Ana-1 cells directly treated cetuximab for 48 h, then Arg1 and iNOS protein levels were detected by Western blot. Cetu: cetuximab, 10 ng/mL.

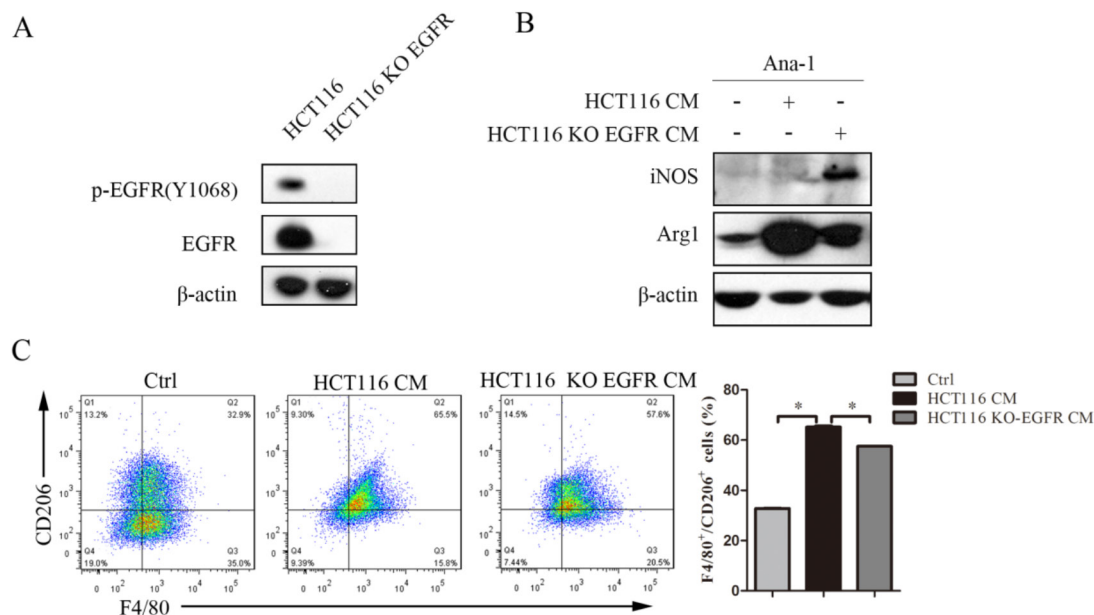

**Supplementary Figure S3: HCT116 CM induced Ana-1 cells polarization to M2-like phenotype and was inhibited when EGFR signaling pathway was blocked.** **A.** EGFR protein levels in HCT116 and HCT116 KO-EGFR cells were detected by Western blot. **B.** Arg1 and iNOS protein levels in Ana-1 cells were detected by Western blot after incubation with RPMI1640, HCT116 CM and HCT116 KO-EGFR CM for 48 h. **C.** Percentages of F4/80<sup>+</sup>/CD206<sup>+</sup> in Ana-1 cells after incubation with RPMI1640, HCT116 CM and HCT116 KO-EGFR CM for 48h were detected by flow cytometry. Bars represent as mean ± SD (n = 3) for each treatment. \**p* < 0.05; \*\**p* < 0.01.

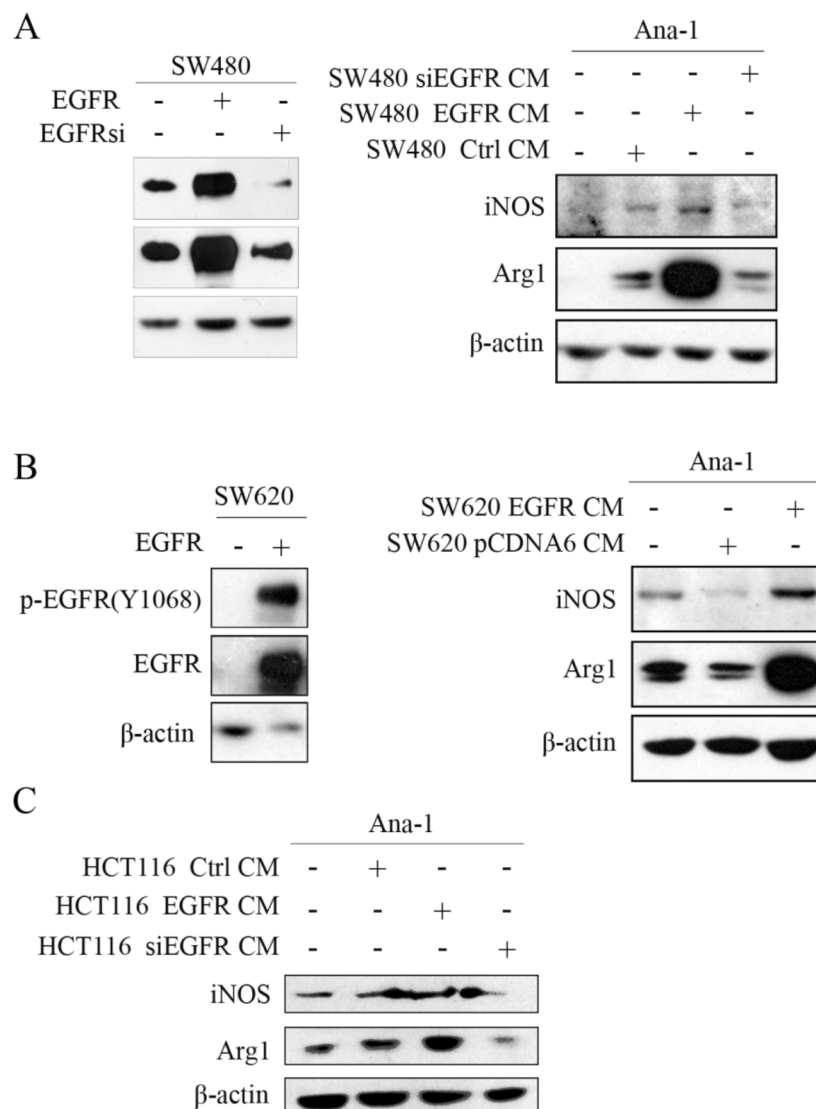

**Supplementary Figure S4: Colon cancer CM induced Ana-1 polarization to M2-like phenotype and correlated positively to EGFR signaling pathway.** **A.** EGFR protein levels in SW480, SW480 cells transfected with EGFR siRNA, pCDNA6 EGFR plasmid for 48 h were detected by Western blot. Then, Arg1 and iNOS protein levels in Ana-1 cells were detected by Western blot after incubation with CM from SW480 ctrl, SW480 siEGFR and SW480 EGFR cells for 48 h. **B.** EGFR protein levels in SW620, SW620 cells transfected with pCDNA6 EGFR plasmid were detected by Western blot. Then, Arg1 and iNOS protein levels in Ana-1 cells were detected by Western blot after incubation with CM from SW620, SW620 EGFR cells for 48 h. **C.** Arg1 and iNOS protein levels in Ana-1 cells were detected by Western blot after incubation with CM from HCT116 ctrl, HCT116 siEGFR and HCT116 EGFR cells for 48 h.

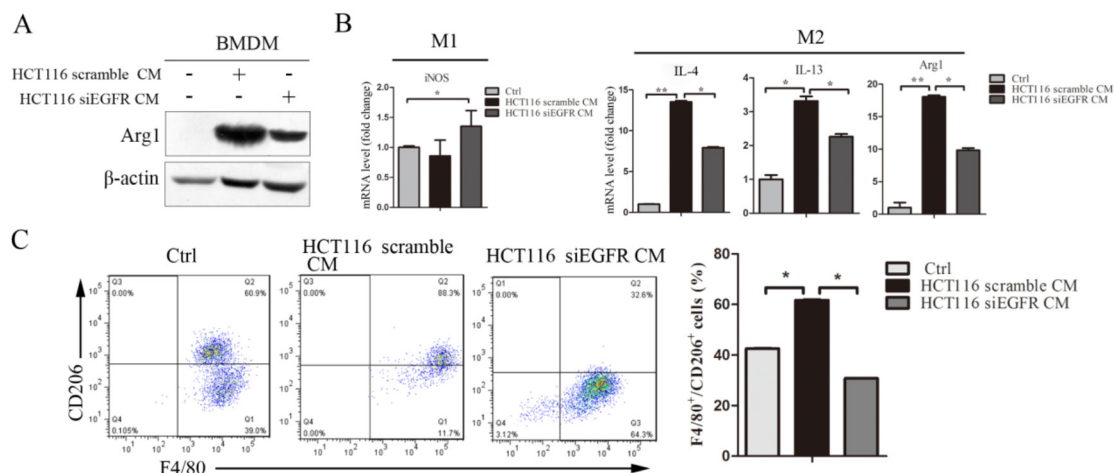

**Supplementary Figure S5: HCT116 scramble EGFR CM induced BMDM cells polarization to M2-like phenotype and was inhibited when EGFR signaling pathway was blocked.** **A.** Arg1 protein level in BMDM cells after incubation with CM from HCT116 scramble, HCT116 siEGFR cells was detected by Western blot. **B.** M1 marker iNOS and M2 related markers (IL-4, IL-13 and Arg1) mRNA levels were detected by q-PCR in BMDM cells after incubation with CM from HCT116 scramble, HCT116 siEGFR cells. **C.** Percentages of F4/80<sup>+</sup>/CD206<sup>+</sup> in BMDM cells were detected by flow cytometry after incubation with CM from HCT116 scramble, HCT116 siEGFR cells. Bars represent as mean  $\pm$  SD (n = 3) for each treatment. \* $p$  < 0.05; \*\* $p$  < 0.01.

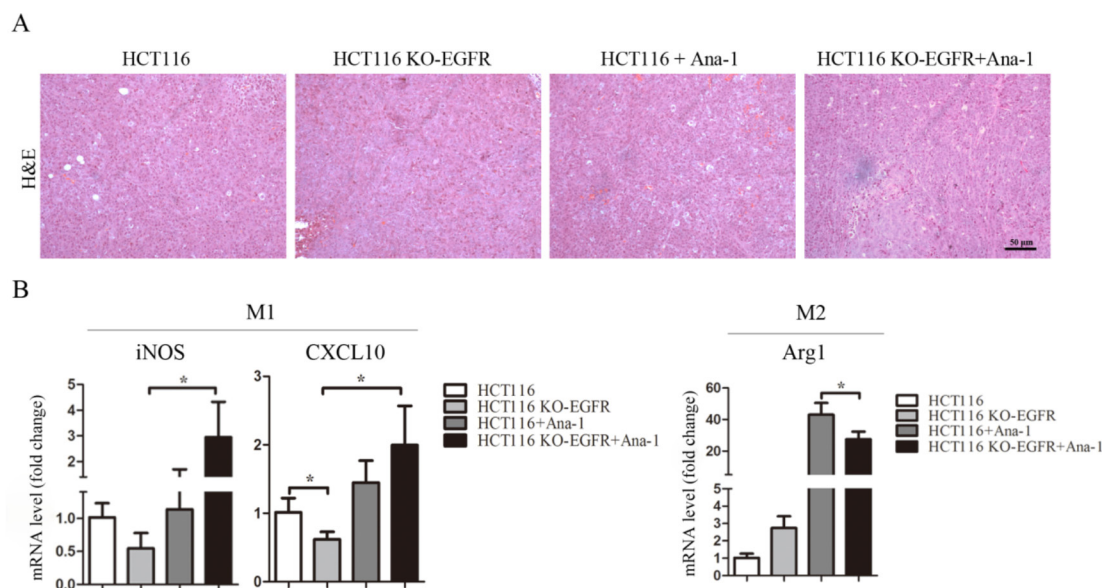

**Supplementary Figure S6: HE staining and M1 and M2 related markers mRNA levels detection of xenograft tumor tissues.** **A.** HE staining of xenograft tissues in injected with HCT116, HCT116 KO-EGFR, HCT116 plus Ana-1, HCT116 KO-EGFR plus Ana-1 mice tumor tissues. **B.** M1 related markers (iNOS and CXCL10) and M2 related marker (Arg1) mRNA levels were detected by q-PCR in xenograft tumor tissues. Bars represent as mean  $\pm$  SD ( $n = 3$ ) for each treatment. \* $p < 0.05$ ; \*\* $p < 0.01$ .

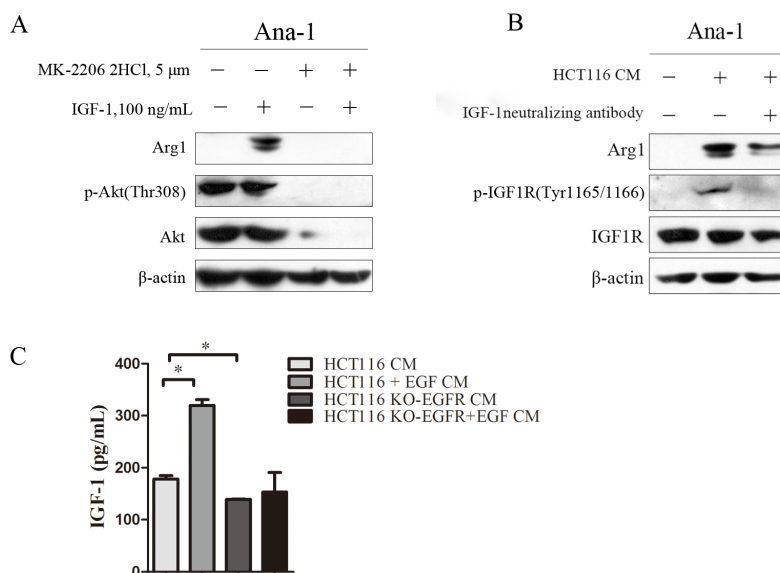

**Supplementary Figure S7: Colon cancer-derived IGF-1 contributes to M2-like macrophage polarization.** **A.** Akt inhibitor MK-2206 2HCL reduced the expression of Arg1 induced by IGF-1. Pretreated Ana-1 cells with Akt inhibitor MK-2206 2HCL (5  $\mu$ m, Selleck Chemicals, Texas, USA) for 30 min, then IGF-1(100 ng/mL) was added to Ana-1 cells for 48 h, the levels of Akt and Arg1 protein were detected by Western blot. **B.** IGF-1 neutralizing antibody decreased the expression of Arg1 induced by HCT116 CM. Pre-mix HCT116 CM with IGF-1 neutralizing antibody (5  $\mu$ g/mL) for 30 min, then the HCT116 CM was added to Ana-1 cells for 48 h, then the levels of IGF1R and Arg1 protein were detected by Western blot. **C.** IGF-1 concentrations increased in EGF stimulated HCT116 cells. Pretreated HCT116 cell with EGF for 24h, then fresh medium were replaced and cultured for a further 24 h. IGF-1 concentrations were determined by ELISA. Bars represent as mean  $\pm$  SD ( $n = 3$ ) for each treatment. \* $p < 0.05$ ; \*\* $p < 0.01$ .
